# Supplementary material
Source: publisher figshare collection journal article supplement (https://acs.figshare.com/ndownloader/files/3959326)

## *Supporting Information*

### **Synthesis and Biological Evaluation of New Bisphosphonate-Dextran Conjugates Targeting Breast Primary Tumor**

Evelyne Migianu-Griffoni,<sup>\*,†</sup> Imène Chebbi,<sup>†</sup> Souad Kachbi,<sup>†</sup> Maelle Monteil,<sup>†</sup>  
Odile Sainte-Catherine,<sup>†</sup> Frédéric Chaubet,<sup>‡</sup> Olivier Oudar,<sup>‡</sup> and Marc Lecouvey<sup>\*,†</sup>

<sup>†</sup> Université Paris 13, Sorbonne Paris Cité, Laboratoire de Chimie, Structure, Propriétés de Biomatériaux et d'Agents Thérapeutiques (CSPBAT), CNRS UMR 7244, 74, Rue Marcel Cachin F-93017 Bobigny, France

<sup>‡</sup> Université Paris 13, Sorbonne Paris Cité, Laboratoire BPC, INSERM U 698, 99, Avenue Jean-Baptiste Clément F-93430 Villetaneuse, France

*\* To whom correspondence should be addressed*

#### **Determination of the degree of substitution (D.S.) in CarboxyMethyl (CM) groups of CMD 1**

The CM content was determined on dried aliquots of dextran derivatives (25-45 mg) by acidimetric titration with NaOH solution in water/acetone mixture (1/1-v/v) acidified with 2N HNO<sub>3</sub>. Two equivalence volumes were distinguished : the first one V<sub>eq1</sub> corresponding to the equivalence of the excess of strong acid HNO<sub>3</sub>; and the second one assigned to the equivalence of the weak carboxylic acid groups of CMD 1. Thus, the amount of CM functions per gram of polymer n<sub>CM</sub> could be calculated by the relation (1) and was about 3.87±0.04 mmol.g<sup>-1</sup>.

$$n_{CM} = (V_{eq2} - V_{eq1}) \times C_{NaOH} / m_{CMD} \quad (1)$$

The amount of remaining free hydroxyl groups n<sub>R-O-H</sub> per gram of polymer must be determined by the equation (2).

$$(n_{R-O-H} \times M_{R-O-H}) + (n_{CM} \times M_{R-O-CM}) = 1 \quad (2)$$

Besides, each glucosidic unit of the dextran macromolecule has a molecular weight of 162.16 Da. Each unit bears three hydroxyl groups on carbon atoms 2, 3 and 4 which could be replaced by a CM group. So, the average molecular weight of one glucosidic unit can be assimilated to three R-O-H subunits with M<sub>R-O-H</sub> = 54.05 Da. When the hydrogen atom is replaced by a CM group, the molecular weight M<sub>R-O-CM</sub> of the subunit is equal to 134.07 Da (CM = CH<sub>2</sub>-COONa). Thus, equation (2) gave n<sub>R-O-H</sub> = 8.90±0.09 mmol.g<sup>-1</sup>. Finally, the D.S. of CMD 1 (0.91) could be determined by the equation (3).

$$D.S. = (3 \times n_{CM}) / (n_{CM} + n_{R-O-H}) \quad (3)$$

# NMR spectra :

## CMD-BPA2 3a – <sup>1</sup>H NMR

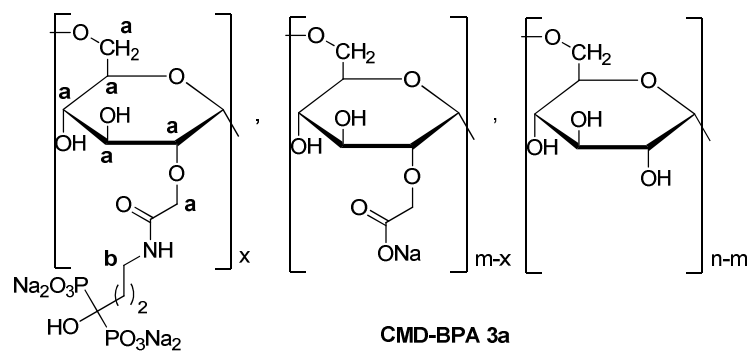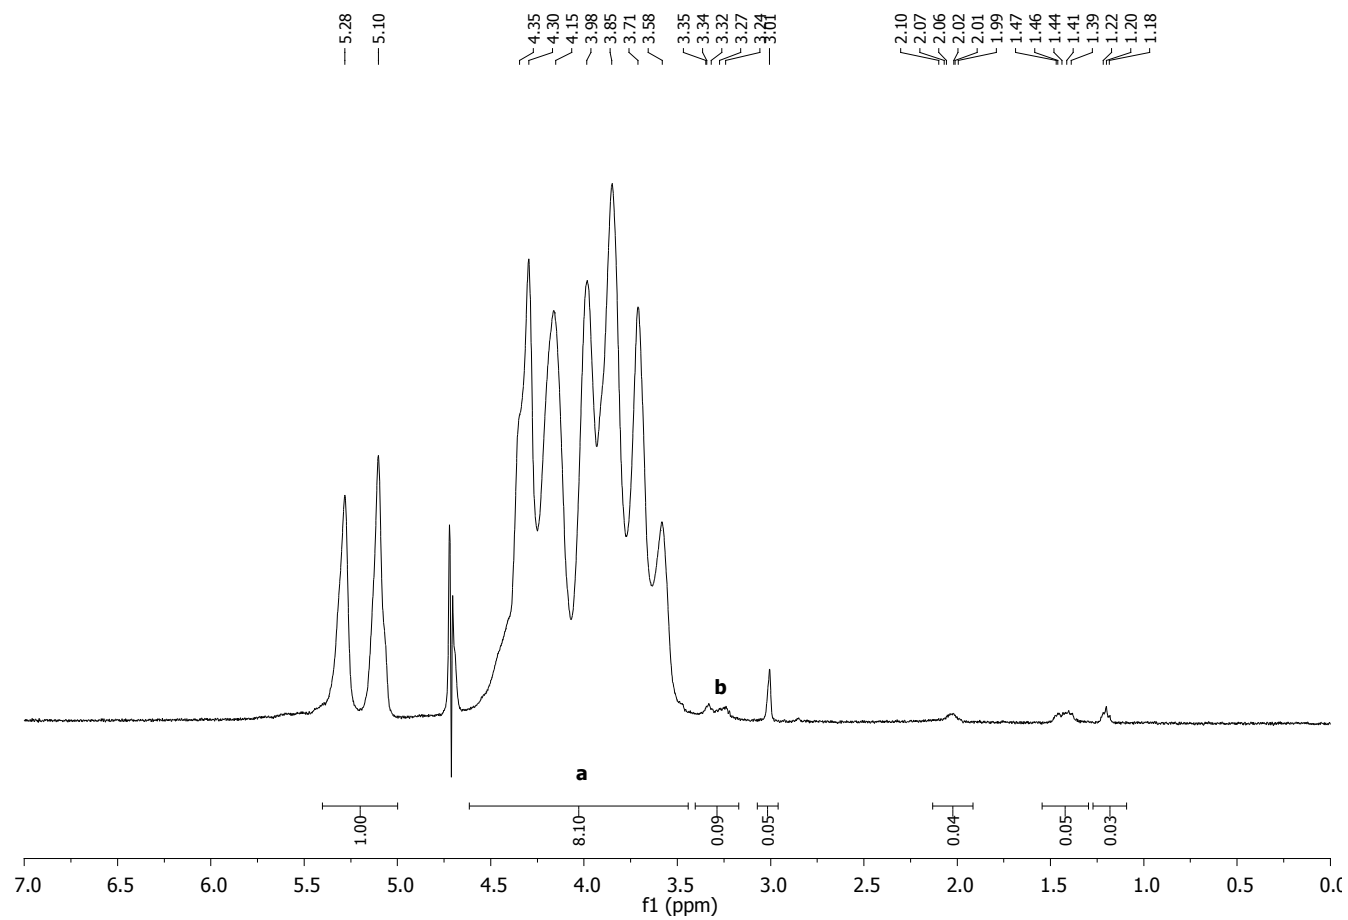

**CMD-BPA2 3a –  $^{31}\text{P}$  NMR**

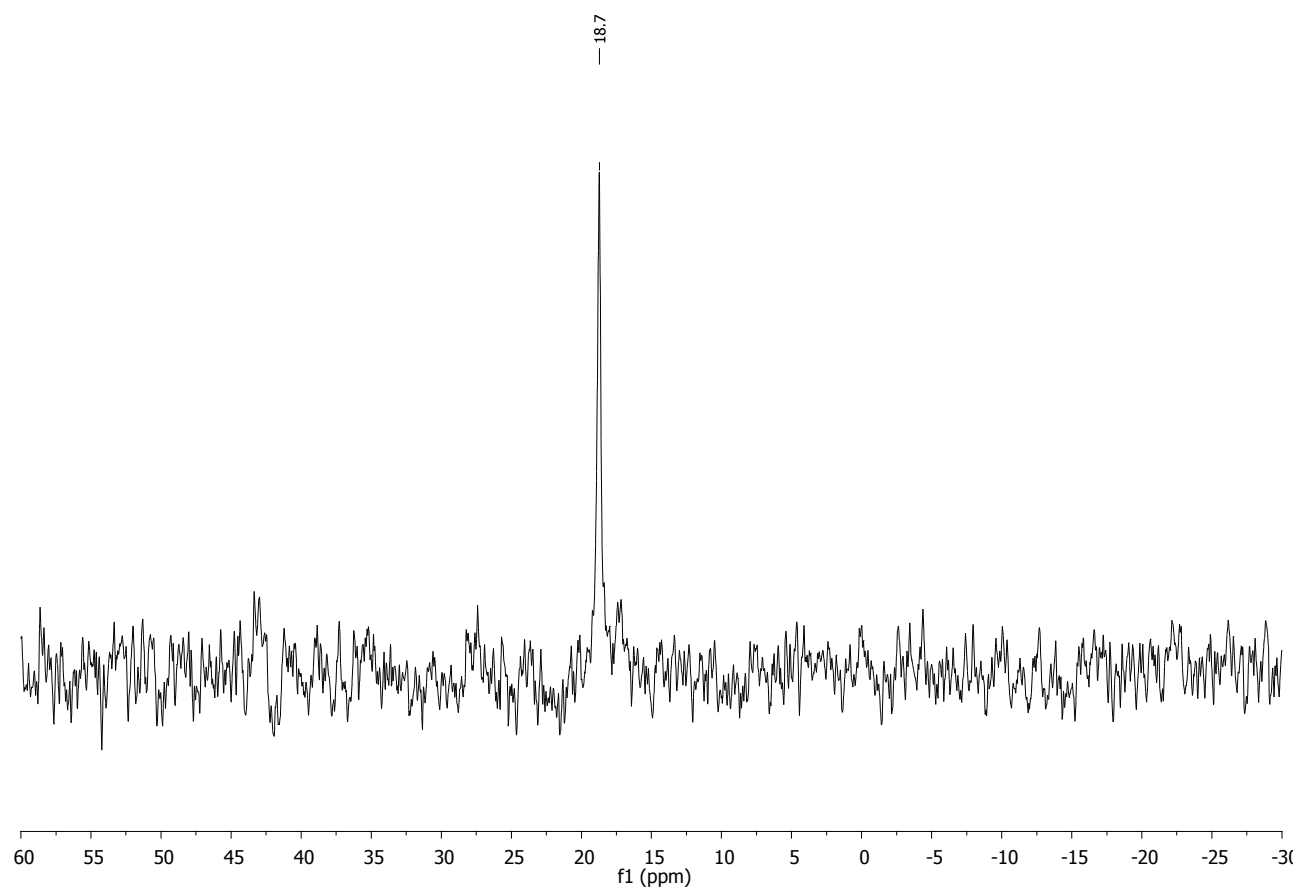

# CMD-BPA3 3b – $^1\text{H}$ NMR

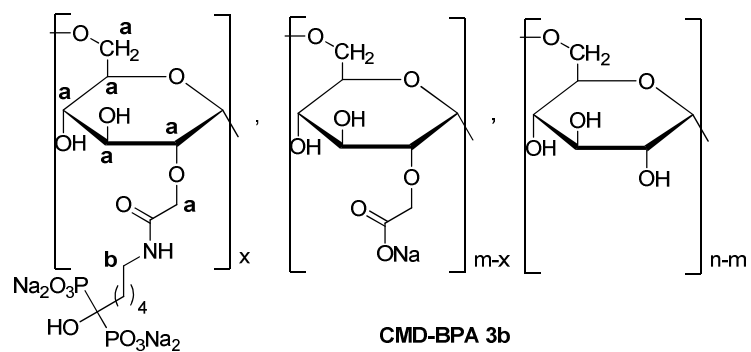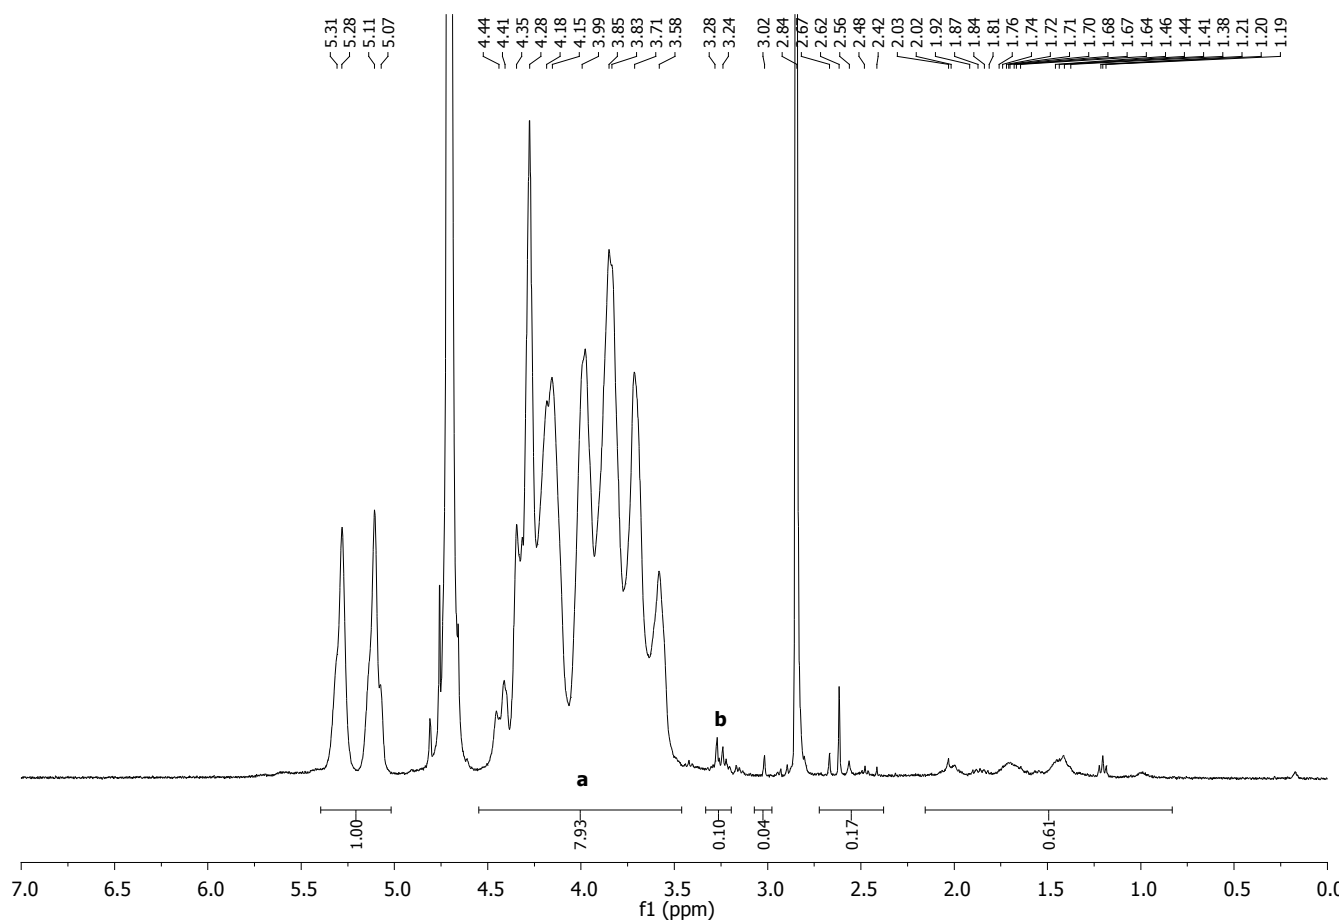

**CMD-BPA3 3b –  $^{31}\text{P}$  NMR**

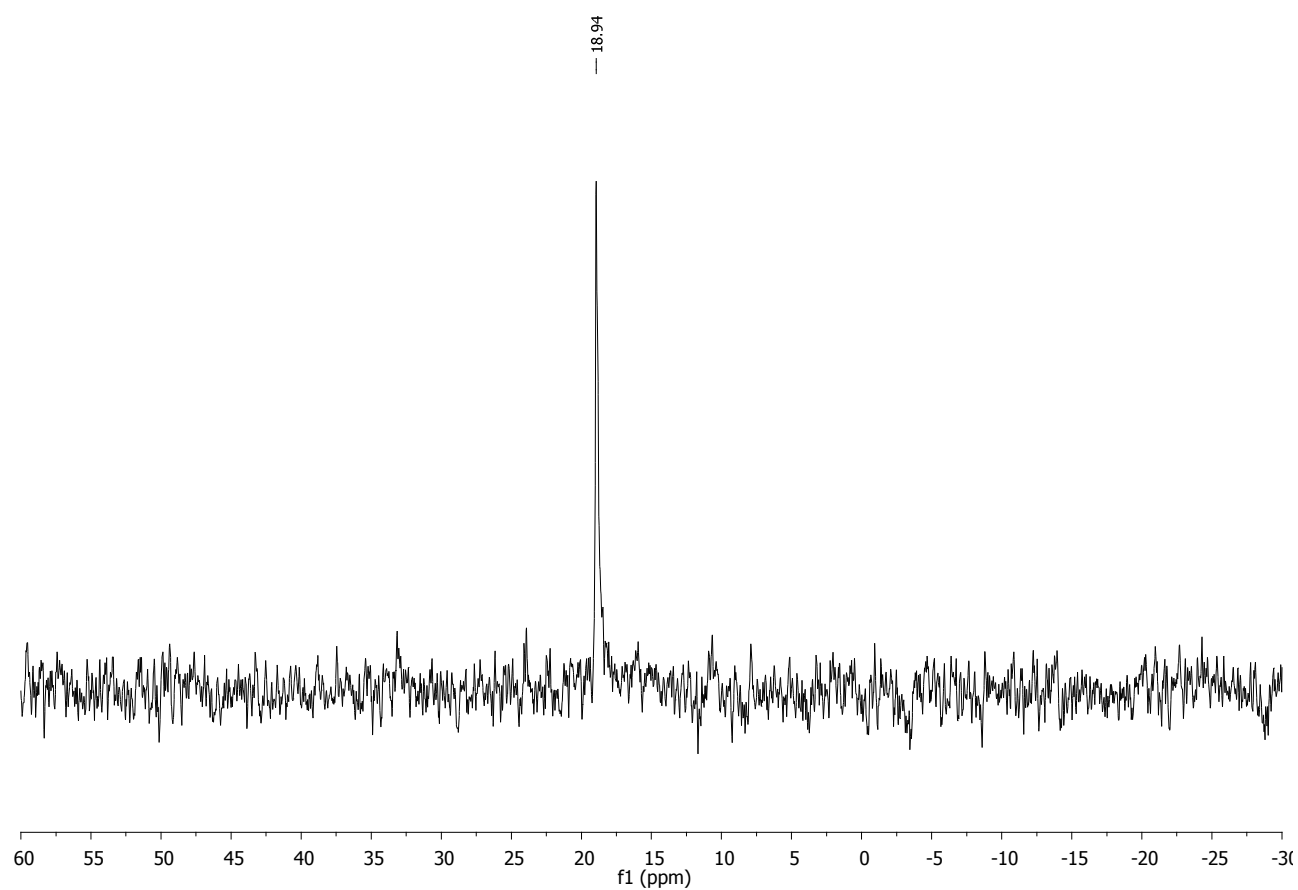

Supplement: Supplementary file 1 [file 3959326]
